# Supplementary material for: Computational understanding role of vacancies and distortions in wurtzite ferroelectric memory materials: implications for device miniaturization
Source: Royal Society of Chemistry journal article supplement (doi:10.1039/d2ma00044j), 2022-01-01
Supplement: d2ma00044j1.pdf [file d2ma00044j1.pdf]

## Supplementary information

### **Computational understanding role of vacancies and distortions in wurtzite ferroelectric memory materials: Implications for device miniaturization**

Qiang Wang,<sup>a</sup> Shao-Xiang Go,<sup>a</sup> Chen Liu,<sup>b</sup> Minghua Li,<sup>b</sup> Yao Zhu,<sup>b</sup> Lunna Li,<sup>a</sup> Tae Hoon Lee,<sup>c,d</sup>

Desmond K. Loke <sup>a,\*</sup>

---

<sup>a</sup> *Department of Science, Mathematics and Technology, Singapore University of Technology and Design, Singapore 487372, Singapore*

<sup>b</sup> *Institute for Microelectronics, Agency for Science, Technology and Research, Singapore 138634, Singapore*

<sup>c</sup> *Department of Engineering, University of Cambridge, Cambridge CB2 1PZ, UK*

<sup>d</sup> *School of Materials Science and Engineering, Kyungpook National University, Daegu 41566, Republic of Korea*

*\*Correspondence and requests for material should be addressed to D.K.L (e-mail: desmond\_loke@sutd.edu.sg).*

## Supplementary Figures

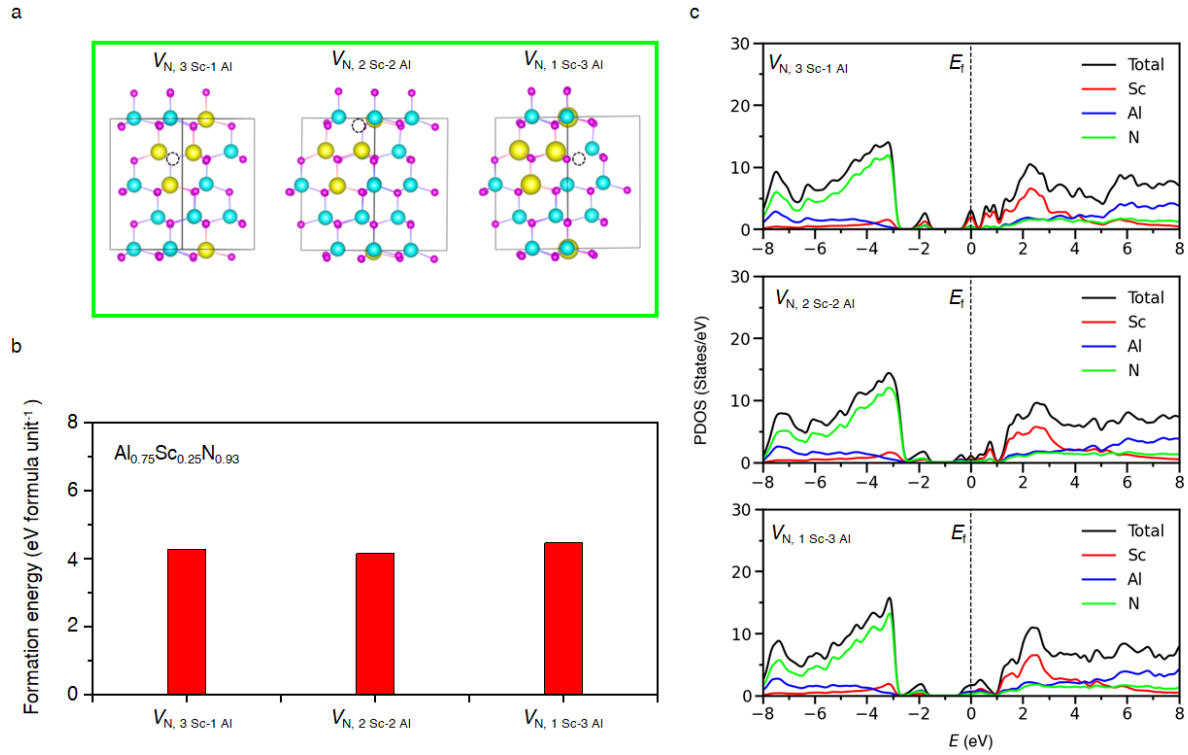

**Fig. S1** Wurtzite structure and defect formation energies of three different AlScN models with one N vacancy. **a)** Snapshots of the AlScN-based systems. Sublattice A comprises N atoms (magenta), and sublattice B comprises Sc atoms (yellow) and Al atoms (cyan). **b)** Formation energies of different models with a N vacancy for the relaxed structures. **c)** Partial density of states (PDOS) of different AlScN models with a nitrogen vacancy in the relaxed state. The Fermi levels  $E_f$  were set to zero energy.

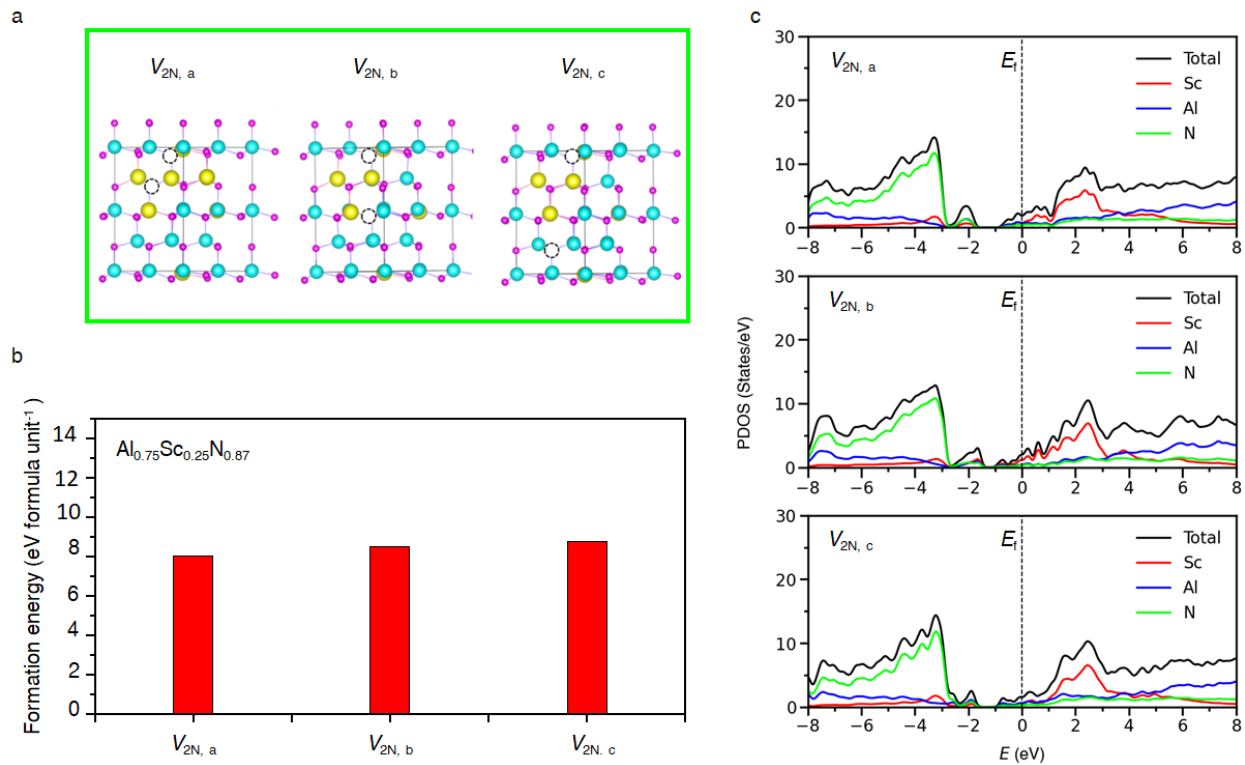

**Fig. S2** Wurtzite structure and defect formation energies of three different AlScN models with two N vacancies. **a)** Snapshots of the AlScN-based system. Sublattice A comprises N atoms (magenta), and sublattice B comprises Sc atoms (yellow) and Al atoms (cyan). **b)** Formation energies of different models with two N vacancies for the relaxed structures. **c)** Partial density of states (PDOS) of different AlScN models with two N vacancies in the relaxed state. The Fermi levels  $E_f$  were to set to zero energy.

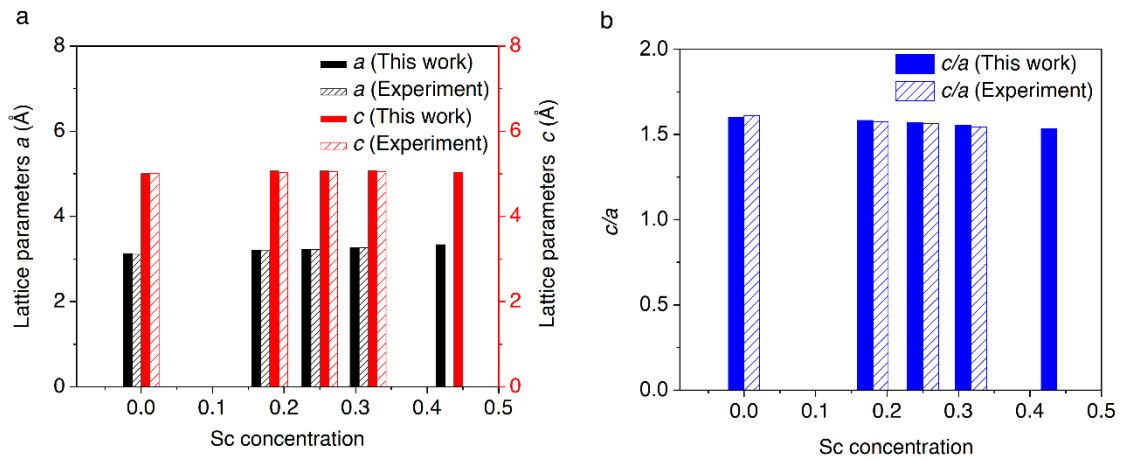

**Fig. S3 a, b)** Sc concentration dependent lattice parameters a)  $a$ ,  $c$  and b) ratio  $c/a$  of  $\text{Al}_{1-x}\text{Sc}_x\text{N}$ . Results of this work (solid bars) agree well with the experimental results (texture bars).<sup>1</sup>

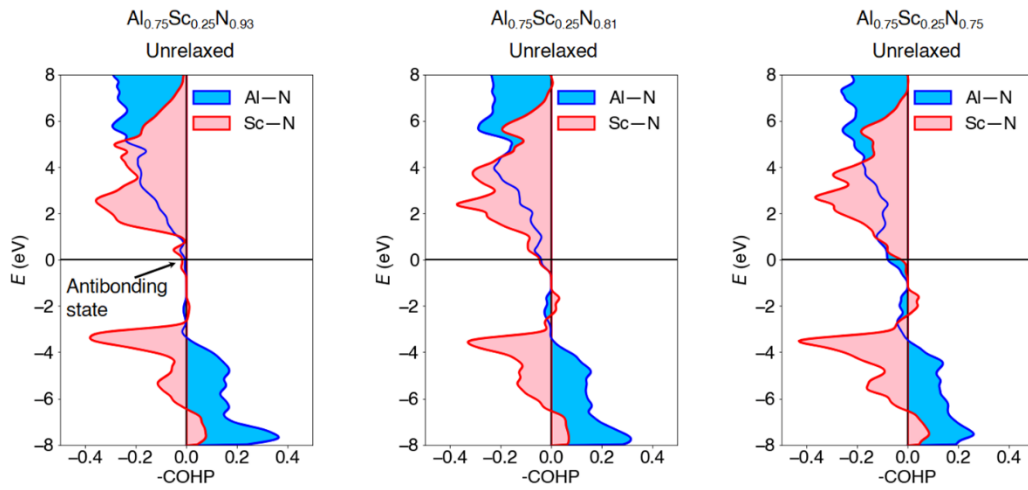

**Fig. S4** COHP analysis of AlScN models with N vacancies for the unrelaxed structures. The COHP of average values of Al–N (blue regions) and Sc–N (red regions) interactions in the  $\text{Al}_{0.75}\text{Sc}_{0.25}\text{N}_{0.93}$ ,  $\text{Al}_{0.75}\text{Sc}_{0.25}\text{N}_{0.81}$  and  $\text{Al}_{0.75}\text{Sc}_{0.25}\text{N}_{0.75}$  for the unrelaxed structures. The Fermi levels  $E_f$  were to set to zero energy. The right and left sides of the plot show bonding and anti-bonding interactions, respectively.

Comparison of the compositions  $\text{Al}_{0.75}\text{Sc}_{0.25}\text{N}_{0.93}$  and  $\text{Al}_{0.75}\text{Sc}_{0.25}\text{N}_{0.81}$  in the unrelaxed state also show that these antibonding interactions increase with an increased N vacancy concentration.

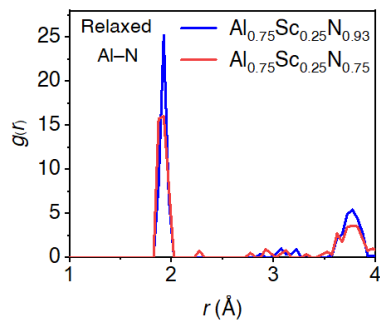

**Fig. S5** PCF analysis of Al–N bonds of the relaxed AlScN models with N vacancies.

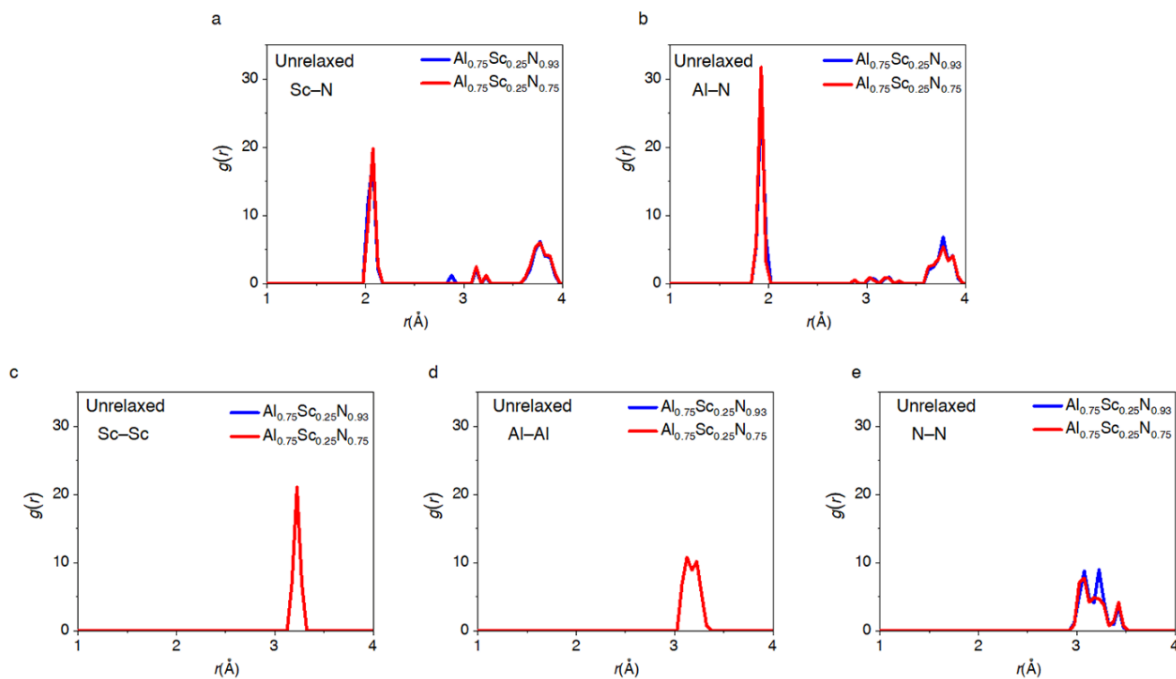

**Fig. S6** PCF analysis of structural features of AlScN models with N vacancies in the unrelaxed state. **a–e)** PCF analyses for the a) N–N, b) Al–Al, c) Sc–Sc, d) Sc–N and e) Al–N bonds for the systems with different N vacancy concentrations.

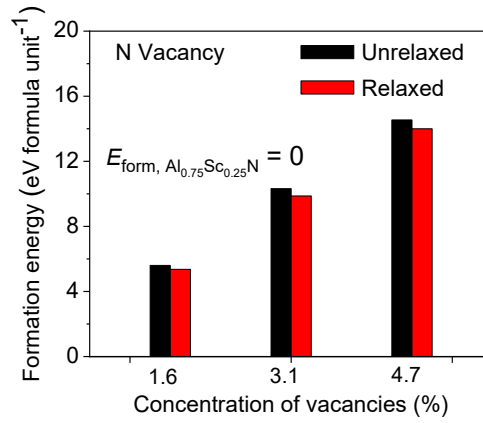

**Fig. S7** Formation energies of the 128-atom AlScN model in the relaxed state for different concentrations of N vacancies.

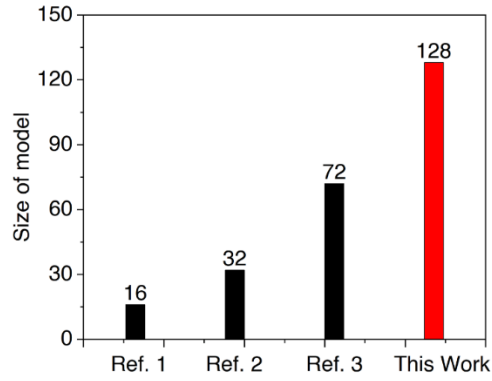

**Fig. S8** Comparison of the size of model utilized in this work with that of state-of-the-art simulations of AlScN materials <sup>2-4</sup>.

**Table S1.** –ICOHPs values of Al–N and Sc–N bonds in  $\text{Al}_{0.75}\text{Sc}_{0.25}\text{N}_{0.93}$  under relaxed state.

| Bond type        | –ICOHP (eV/bond) | Bond type | –ICOHP (eV/bond) |
|------------------|------------------|-----------|------------------|
| <b>Al–N bond</b> |                  |           |                  |
| Al1–N1           | 1.40795          | Al7–N1    | 1.88992          |
| Al1–N13          | 1.63191          | Al7–N2    | 1.8233           |
| Al1–N14          | 1.84841          | Al7–N4    | 2.11666          |
| Al2–N2           | 1.85005          | Al7–N9    | 2.06656          |
| Al2–N13          | 2.12609          | Al8–N1    | 1.90135          |
| Al2–N14          | 1.99527          | Al8–N2    | 1.89362          |
| Al2–N15          | 2.10547          | Al8–N3    | 1.85411          |
| Al3–N3           | 1.47627          | Al8–N10   | 2.16604          |
| Al3–N14          | 1.80509          | Al9–N2    | 1.83396          |
| Al3–N15          | 1.69261          | Al9–N3    | 1.74845          |
| Al4–N5           | 1.81439          | Al9–N4    | 2.05922          |
| Al4–N9           | 1.50806          | Al9–N11   | 2.14637          |
| Al4–N10          | 1.69574          | Al10–N1   | 1.67368          |
| Al4–N12          | 1.73719          | Al10–N3   | 1.65255          |
| Al5–N5           | 1.99918          | Al10–N4   | 2.05361          |
| Al5–N9           | 1.67822          | Al10–N12  | 2.16566          |
| Al5–N10          | 1.84993          | Al11–N5   | 1.86395          |
| Al5–N11          | 1.73973          | Al11–N6   | 1.68895          |
| Al6–N8           | 1.93497          | Al11–N8   | 1.67071          |
| Al6–N9           | 1.70093          | Al11–N13  | 1.65237          |
| Al6–N11          | 1.83753          | Al12–N6   | 1.67161          |
| Al6–N12          | 1.92462          | Al12–N7   | 1.94118          |
|                  |                  | Al12–N8   | 1.6209           |
|                  |                  | Al12–N15  | 1.78105          |
| <b>Sc–N bond</b> |                  |           |                  |
| Sc1–N4           | 1.23219          | Sc3–N5    | 1.34061          |
| Sc1–N13          | 1.12398          | Sc3–N6    | 1.18650          |
| Sc1–N15          | 1.18627          | Sc3–N7    | 1.70133          |
| Sc2–N7           | 1.65469          | Sc3–N14   | 1.06077          |
| Sc2–N10          | 1.25421          | Sc4–N5    | 1.46588          |
| Sc2–N11          | 1.29225          | Sc4–N7    | 1.80352          |
| Sc2–N12          | 1.29802          | Sc4–N8    | 1.09161          |

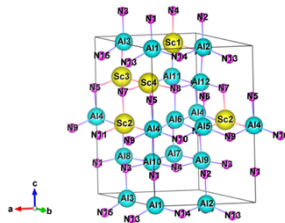Numbering of atoms for the composition  $\text{Al}_{0.75}\text{Sc}_{0.25}\text{N}_{0.93}$ .



**Table S2.** –ICOHPs values of Al–N and Sc–N bonds in  $\text{Al}_{0.75}\text{Sc}_{0.25}\text{N}_{0.93}$  under unrelaxed state.

| Bond type        | –ICOHP (eV/bond) | Bond type | –ICOHP (eV/bond) |
|------------------|------------------|-----------|------------------|
| <b>Al–N bond</b> |                  |           |                  |
| Al1–N1           | 1.43404          | Al7–N1    | 1.86084          |
| Al1–N13          | 1.77315          | Al7–N2    | 1.80716          |
| Al1–N14          | 1.78874          | Al7–N4    | 2.15347          |
| Al2–N2           | 1.81861          | Al7–N9    | 2.07026          |
| Al2–N13          | 2.10463          | Al8–N1    | 1.90565          |
| Al2–N14          | 1.98765          | Al8–N2    | 1.94196          |
| Al2–N15          | 2.09442          | Al8–N3    | 1.87866          |
| Al3–N3           | 1.48353          | Al8–N10   | 2.15759          |
| Al3–N14          | 1.7806           | Al9–N2    | 1.81969          |
| Al3–N15          | 1.81121          | Al9–N3    | 1.72337          |
| Al4–N5           | 1.86061          | Al9–N4    | 2.05279          |
| Al4–N9           | 1.49147          | Al9–N11   | 2.10538          |
| Al4–N10          | 1.68096          | Al10–N1   | 1.68247          |
| Al4–N12          | 1.69045          | Al10–N3   | 1.64395          |
| Al5–N5           | 2.00428          | Al10–N4   | 2.05021          |
| Al5–N9           | 1.66854          | Al10–N12  | 2.15304          |
| Al5–N10          | 1.81347          | Al11–N5   | 1.82617          |
| Al5–N11          | 1.68617          | Al11–N6   | 1.66089          |
| Al6–N8           | 1.99424          | Al11–N8   | 1.66933          |
| Al6–N9           | 1.68614          | Al11–N13  | 1.67801          |
| Al6–N11          | 1.79807          | Al12–N6   | 1.65042          |
| Al6–N12          | 1.8729           | Al12–N7   | 1.91451          |
|                  |                  | Al12–N8   | 1.60108          |
|                  |                  | Al12–N15  | 1.73716          |
| <b>Sc–N bond</b> |                  |           |                  |
| Sc1–N4           | 1.25411          | Sc3–N5    | 1.383            |
| Sc1–N13          | 1.16354          | Sc3–N6    | 1.13783          |
| Sc1–N15          | 1.20295          | Sc3–N7    | 1.76057          |
| Sc2–N7           | 1.65424          | Sc3–N14   | 0.98434          |
| Sc2–N10          | 1.22761          | Sc4–N5    | 1.41252          |
| Sc2–N11          | 1.33788          | Sc4–N7    | 1.77724          |
| Sc2–N12          | 1.28295          | Sc4–N8    | 1.09199          |

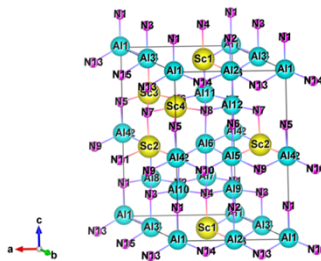Numbering of atoms for the composition  $\text{Al}_{0.75}\text{Sc}_{0.25}\text{N}_{0.93}$ .

**Table S3.** –ICOHPs values of Al–N and Sc–N bonds in  $\text{Al}_{0.75}\text{Sc}_{0.25}\text{N}_{0.75}$  under relaxed state.

| Bond type        | –ICOHP (eV/bond) | Bond type | –ICOHP (eV/bond) |
|------------------|------------------|-----------|------------------|
| <b>Al–N bond</b> |                  |           |                  |
| Al1–N1           | 0.99082          | Al17–N1   | 1.96933          |
| Al1–N10          | 1.36999          | Al17–N2   | 1.89289          |
| Al1–N11          | 1.31139          | Al17–N3   | 2.06150          |
| Al2–N2           | 1.53151          | Al8–N1    | 1.59327          |
| Al2–N10          | 2.01809          | Al8–N2    | 1.61426          |
| Al2–N11          | 1.70827          | Al8–N7    | 1.35853          |
| Al2–N12          | 1.99916          | Al9–N2    | 1.56243          |
| Al3–N11          | 1.45376          | Al9–N3    | 1.89695          |
| Al3–N12          | 1.11759          | Al9–N8    | 1.92249          |
| Al4–N4           | 1.6061           | Al10–N1   | 1.52544          |
| Al4–N7           | 1.66791          | Al10–N3   | 1.84154          |
| Al4–N9           | 1.44615          | Al10–N9   | 1.82002          |
| Al5–N5           | 2.00561          | Al11–N4   | 1.77495          |
| Al5–N7           | 1.5193           | Al11–N5   | 1.75956          |
| Al5–N8           | 1.54503          | Al11–N6   | 1.62824          |
| Al6–N6           | 2.03209          | Al11–N10  | 1.77261          |
| Al6–N8           | 1.71675          | Al12–N5   | 1.39305          |
| Al6–N9           | 1.77173          | Al12–N6   | 1.28137          |
|                  |                  | Al12–N12  | 1.51700          |
| <b>Sc–N bond</b> |                  |           |                  |
| Sc1–N3           | 1.00753          | Sc3–N4    | 1.23160          |
| Sc1–N10          | 1.14678          | Sc3–N5    | 1.10956          |
| Sc1–N12          | 1.01977          | Sc3–N11   | 1.05721          |
| Sc2–N7           | 1.49311          | Sc4–N4    | 1.33977          |
| Sc2–N8           | 1.22692          | Sc4–N6    | 1.17057          |
| Sc2–N9           | 1.22735          |           |                  |

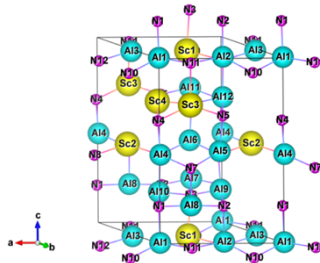The numbering of atoms for the composition  $\text{Al}_{0.75}\text{Sc}_{0.25}\text{N}_{0.75}$ .

**Table S4.** –ICOHPs values of Al–N and Sc–N bonds in  $\text{Al}_{0.75}\text{Sc}_{0.25}\text{N}_{0.75}$  under unrelaxed state.

| Bond type        | –ICOHP (eV/bond) | Bond type | –ICOHP (eV/bond) |
|------------------|------------------|-----------|------------------|
| <b>Al–N bond</b> |                  |           |                  |
| Al1–N1           | 1.01866          | Al7–N1    | 1.97084          |
| Al1–N10          | 1.43072          | Al7–N2    | 1.85532          |
| Al1–N11          | 1.36213          | Al7–N3    | 2.05874          |
| Al2–N2           | 1.59093          | Al8–N1    | 1.64838          |
| Al2–N10          | 1.97142          | Al8–N2    | 1.68682          |
| Al2–N11          | 1.74751          | Al8–N7    | 1.76536          |
| Al2–N12          | 1.95204          | Al9–N2    | 1.62205          |
| Al3–N11          | 1.53663          | Al9–N3    | 1.88131          |
| Al3–N12          | 1.09528          | Al9–N8    | 2.02815          |
| Al4–N4           | 1.63872          | Al10–N1   | 1.54279          |
| Al4–N7           | 1.52927          | Al10–N3   | 1.80578          |
| Al4–N9           | 1.2974           | Al10–N9   | 1.85396          |
| Al5–N5           | 1.98063          | Al11–N4   | 1.71755          |
| Al5–N7           | 1.51183          | Al11–N5   | 1.68762          |
| Al5–N8           | 1.5133           | Al11–N6   | 1.60101          |
| Al6–N6           | 2.07103          | Al11–N10  | 1.77056          |
| Al6–N8           | 1.57122          | Al12–N5   | 1.33914          |
| Al6–N9           | 1.62891          | Al12–N6   | 1.24934          |
|                  |                  | Al12–N12  | 1.42897          |
| <b>Sc–N bond</b> |                  |           |                  |
| Sc1–N3           | 1.01474          | Sc3–N4    | 1.20300          |
| Sc1–N10          | 1.11407          | Sc3–N5    | 1.11131          |
| Sc1–N12          | 1.04781          | Sc3–N11   | 1.09734          |
| Sc2–N7           | 1.37999          | Sc4–N4    | 1.32966          |
| Sc2–N8           | 1.15835          | Sc4–N6    | 1.13443          |
| Sc2–N9           | 1.22982          |           |                  |

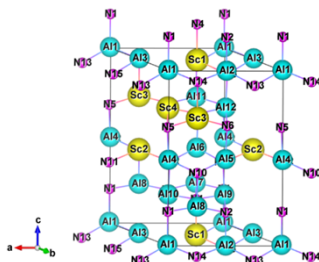

The numbering of atoms for the composition  $\text{Al}_{0.75}\text{Sc}_{0.25}\text{N}_{0.75}$ .

**Table S5.** Comparison of average –ICOHPs values of Al–N and Sc–N bonds in compositions  $\text{Al}_{0.75}\text{Sc}_{0.25}\text{N}_{0.93}$  and  $\text{Al}_{0.75}\text{Sc}_{0.25}\text{N}_{0.75}$  in the relaxed state and unrelaxed state.

| Composition                                       | Sc–N bond        |         | Al–N bond        |         |
|---------------------------------------------------|------------------|---------|------------------|---------|
|                                                   | Average          |         | Average          |         |
|                                                   | –ICOHP (eV/bond) |         | –ICOHP (eV/bond) |         |
|                                                   | Unrelaxed        | Relaxed | Unrelaxed        | Relaxed |
| $\text{Al}_{0.75}\text{Sc}_{0.25}\text{N}_{0.93}$ | 1.3336           | 1.3351  | 1.7804           | 1.8057  |
| $\text{Al}_{0.75}\text{Sc}_{0.25}\text{N}_{0.75}$ | 1.1655           | 1.1846  | 1.6476           | 1.6487  |

## References

1. M. Akiyama, T. Kamohara, K. Kano, A. Teshigahara, Y. Takeuchi and N. Kawahara, *Advanced Materials*, 2009, **21**, 593-596.
2. H. Momida, A. Teshigahara and T. Oguchi, *AIP Advances*, 2016, **6**, 065006.
3. D. F. Urban, O. Ambacher and C. Elsässer, *Physical Review B*, 2021, **103**, 115204.
4. K. Furuta, K. Hirata, S. A. Anggraini, M. Akiyama, M. Uehara and H. Yamada, *Journal of Applied Physics*, 2021, **130**, 024104.
